# Supplementary material for: Single-cell profiling identifies a CD8bright CD244bright Natural Killer cell subset that reflects disease activity in HLA-A29-positive birdshot chorioretinopathy.
Source: Research Square preprint supplement (doi:10.21203/rs.3.rs-2272009/v1), 2022-11-30
Supplement: Supplementary file 1 [file 081942317faab106d4dea869.xlsx]

## Sheet: Sheet1
10X Genomics Primers for GEX
Primer Name	Primer Sequence
Gel Bead Primer	5’-CTACACGACGCTCTTCCGATCTNNNNNNNNNNNNNNNNNNNNNNNNNNNNTTTTTTTTTTTTTTTTTTTTTTTTTTTTTTVN-3’
Template Switch Primer	5’-AAGCAGTGGTATCAACGCAGAGTACATrGrGrG-3’
cDNA Forward Primer	5’-CTACACGACGCTCTTCCGATCT-3’
cDNA Reverse Primer	5’-AAGCAGTGGTATCAACGCAGAG-3’
Adapter Primer 1	5’- GATCGGAAGAGCACACGTCTGAACTCCAGTCA-3’
Adapter Primer 2	3’-TCTAGCCTTCTCG-5’
SI Primer P5	5’-AATGATACGGCGACCACCGAGATCTACACTCTTTCCCTACACGACGCTC-3’
SI Primer P7	5’-CAAGCAGAAGACGGCATACGAGATNNNNNNNN GTGACTGGAGTTCAGACGTGT-3’ (Ns represent barcodes)
10x Genomics Barcodes
Barcode Set Name	Barcode1	Barcode2	Barcode3	Barcode4
SI-GA-A1	GGTTTACT	CTAAACGG	TCGGCGTC	AACCGTAA
SI-GA-A2	TTTCATGA	ACGTCCCT	CGCATGTG	GAAGGAAC
SI-GA-A3	CAGTACTG	AGTAGTCT	GCAGTAGA	TTCCCGAC
SI-GA-A4	TATGATTC	CCCACAGT	ATGCTGAA	GGATGCCG
SI-GA-A5	CTAGGTGA	TCGTTCAG	AGCCAATT	GATACGCC
SI-GA-A6	CGCTATGT	GCTGTCCA	TTGAGATC	AAACCGAG
SI-GA-A7	ACAGAGGT	TATAGTTG	CGGTCCCA	GTCCTAAC
SI-GA-A8	GCATCTCC	TGTAAGGT	CTGCGATG	AACGTCAA
SI-GA-A9	TCTTAAAG	CGAGGCTC	GTCCTTCT	AAGACGGA
SI-GA-A10	GAAACCCT	TTTCTGTC	CCGTGTGA	AGCGAAAG
SI-GA-A11	GTCCGGTC	AAGATCAT	CCTGAAGG	TGATCTCA
SI-GA-A12	AGTGGAAC	GTCTCCTT	TCACATCA	CAGATGGG
SI-GA-B1	GTAATCTT	TCCGGAAG	AGTTCGGC	CAGCATCA
SI-GA-B2	TACTCTTC	CCTGTGCG	GGACACGT	ATGAGAAA
SI-GA-B3	GTGTATTA	TGTGCGGG	ACCATAAC	CAACGCCT
SI-GA-B4	ACTTCATA	GAGATGAC	TGCCGTGG	CTAGACCT
SI-GA-B5	AATAATGG	CCAGGGCA	TGCCTCAT	GTGTCATC
SI-GA-B6	CGTTAATC	GCCACGCT	TTACTCAG	AAGGGTGA
SI-GA-B7	AAACCTCA	GCCTTGGT	CTGGACTC	TGTAGAAG
SI-GA-B8	AAAGTGCT	GCTACCTG	TGCTGTAA	CTGCAAGC
SI-GA-B9	CTGTAACT	TCTAGCGA	AGAGTGTG	GACCCTAC
SI-GA-B10	ACCGTATG	GATTAGAT	CTGACTGA	TGACGCCC
SI-GA-B11	GTTCCTCA	AGGTACGC	TAAGTATG	CCCAGGAT
SI-GA-B12	TACCACCA	CTAAGTTT	GGGTCAAG	ACTGTGGC
SI-GA-C1	CCACTTAT	AACTGGCG	TTGGCATA	GGTAACGC
SI-GA-C2	CCTAGACC	ATCTCTGT	TAGCTCTA	GGAGAGAG
SI-GA-C3	TCAGCCGT	CAGAGGCC	GGTCAATA	ATCTTTAG
SI-GA-C4	ACAATTCA	TGCGCAGC	CATCACTT	GTGTGGAG
SI-GA-C5	CGACTTGA	TACAGACT	ATTGCGTG	GCGTACAC
SI-GA-C6	ATTACTTC	TGCGAACT	GCATTCGG	CAGCGGAA
SI-GA-C7	GTCTCTCG	AATCTCTC	CGGAGGGA	TCAGAAAT
SI-GA-C8	GTTGAGAA	AGATCTGG	TCGATACT	CACCGCTC
SI-GA-C9	GCGCAGAA	ATCTTACC	TATGGTGT	CGAACCTG
SI-GA-C10	TCTCAGTG	GAGACTAT	CGCTTAGC	ATAGGCCA
SI-GA-C11	GAGGATCT	AGACCATA	TCCTGCGC	CTTATGAG
SI-GA-C12	TCTCGTTT	GGCTAGCG	ATGACCGC	CAAGTAAA
SI-GA-D1	CACTCGGA	GCTGAATT	TGAAGTAC	ATGCTCCG
SI-GA-D2	TAACAAGG	GGTTCCTC	ATCATGCA	CCGGGTAT
SI-GA-D3	ACATTACT	TTTGGGTA	CAGCCCAC	GGCAATGG
SI-GA-D4	CCCTAACA	ATTCCGAT	TGGATTGC	GAAGGCTG
SI-GA-D5	CTCGTCAC	GATCAGCA	ACAACAGG	TGGTGTTT
SI-GA-D6	CATGCGAT	TGATATTC	GTGATCGA	ACCCGACG
SI-GA-D7	ATTTGCTA	TAGACACC	CCACAGGG	GGCGTTAT
SI-GA-D8	GCAACAAA	TAGTTGTC	CGCCATCG	ATTGGCGT
SI-GA-D9	AGGAGATG	GATGTGGT	CTACATCC	TCCTCCAA
SI-GA-D10	CAATACCC	TGTCTATG	ACCACGAA	GTGGGTGT
SI-GA-D11	CTTTGCGG	TGCACAAA	AAGCAGTC	GCAGTTCT
SI-GA-D12	GCACAATG	CTTGGTAC	TGCACCGT	AAGTTGCA
SI-GA-E1	TGGTAAAC	GAAAGGGT	ACTGCTCG	CTCCTCTA
SI-GA-E2	GTGGTACC	TACTATAG	ACAAGGTA	CGTCCCGT
SI-GA-E3	AGGTATTG	CTCCTAGT	TCAAGGCC	GATGCCAA
SI-GA-E4	TTCGCCCT	GGATGGGC	AATCAATG	CCGATTAA
SI-GA-E5	CATTAGCG	TTCGCTGA	ACAAGAAT	GGGCTCTC
SI-GA-E6	CTGCGGCT	GACTCAAA	AGAAACTC	TCTGTTGG
SI-GA-E7	CACGCCTT	GTATATAG	TCTCGGGC	AGGATACA
SI-GA-E8	ATAGTTAC	TGCTGAGT	CCTACGTA	GAGCACCG
SI-GA-E9	TTGTTTCC	GGAGGAGG	CCTAACAA	AACCCGTT
SI-GA-E10	AAATGTGC	GGGCAAAT	TCTATCCG	CTCGCGTA
SI-GA-E11	AAGCGCTG	CGTTTGAT	GTAGCACA	TCCAATGC
SI-GA-E12	ACCGGCTC	GAGTTAGT	CGTCCTAG	TTAAAGCA
SI-GA-F1	GTTGCAGC	TGGAATTA	CAATGGAG	ACCCTCCT
SI-GA-F2	TTTACATG	CGCGATAC	ACGCGGGT	GAATTCCA
SI-GA-F3	TTCAGGTG	ACGGACAT	GATCTTGA	CGATCACC
SI-GA-F4	CCCAATAG	GTGTCGCT	AGAGTCGC	TATCGATA
SI-GA-F5	GACTACGT	CTAGCGAG	TCTATATC	AGGCGTCA
SI-GA-F6	CGGAGCAC	GACCTATT	ACTTAGGA	TTAGCTCG
SI-GA-F7	CGTGCAGA	AACAAGAT	TCGCTTCG	GTATGCTC
SI-GA-F8	CATGAACA	TCACTCGC	AGCTGGAT	GTGACTTG
SI-GA-F9	CAAGCTCC	GTTCACTG	TCGTGAAA	AGCATGGT
SI-GA-F10	GCTTGGCT	AAACAAAC	CGGGCTTA	TTCATCGG
SI-GA-F11	GCGAGAGT	TACGTTCA	AGTCCCAC	CTATAGTG
SI-GA-F12	TGATGCAT	GCTACTGA	CACCTGCC	ATGGAATG
SI-GA-G1	ATGAATCT	GATCTCAG	CCAGGAGC	TGCTCGTA
SI-GA-G2	TGATTCTA	ACTAGGAG	CAGCCACT	GTCGATGC
SI-GA-G3	CCTCATTC	AGCATCCG	GTGGCAAT	TAATGGGA
SI-GA-G4	GCGATGTG	AGATACAA	TTTCCACT	CACGGTGC
SI-GA-G5	GAGCAAGA	TCTGTGAT	CGCAGTTC	ATATCCCG
SI-GA-G6	CTGACGCG	GGTCGTAC	TCCTTCTT	AAAGAAGA
SI-GA-G7	GGTATGCA	CTCGAAAT	ACACCTTC	TAGTGCGG
SI-GA-G8	TATGAGCT	CCGATAGC	ATACCCAA	GGCTGTTG
SI-GA-G9	TAGGACGT	ATCCCACA	GGAATGTC	CCTTGTAG
SI-GA-G10	TCGCCAGC	AATGTTAG	CGATAGCT	GTCAGCTA
SI-GA-G11	TTATCGTT	AGCAGAGC	CATCTCCA	GCGGATAG
SI-GA-G12	ATTCTAAG	CCCGATTA	TGGAGGCT	GAATCCGC
SI-GA-H1	GTATGTCA	TGTCAGAC	CACGTCGG	ACGACATT
SI-GA-H2	TAATGACC	ATGCCTTA	GCCGAGAT	CGTATCGG
SI-GA-H3	CCAAGATG	AGGCCCGA	TACGTGAC	GTTTATCT
SI-GA-H4	GCCATTCC	CAAGAATT	TTGCCGGA	AGTTGCAG
SI-GA-H5	CCACTACA	GATTCTGG	TGCGGCTT	ATGAAGAC
SI-GA-H6	TAGGATAA	CCTTTGTC	GTACGCGG	AGCACACT
SI-GA-H7	AGCTATCA	CATATAAC	TCAGGGTG	GTGCCCGT
SI-GA-H8	TTGTTGAT	GCTCAACC	CAAAGTGG	AGCGCCTA
SI-GA-H9	ACACTGTT	CAGGATGG	GGCTGAAC	TTTACCCA
SI-GA-H10	GTAATTGC	AGTCGCTT	CACGAGAA	TCGTCACG
SI-GA-H11	GGCGAGTA	ACTTCTAT	CAAATACG	TTGCGCGC
SI-GA-H12	GACAGCAT	TTTGTACA	AGGCCGTG	CCATATGC
