# Supplementary material for: Single-cell profiling identifies a CD8bright CD244bright Natural Killer cell subset that reflects disease activity in HLA-A29-positive birdshot chorioretinopathy.
Source: Research Square preprint supplement (doi:10.21203/rs.3.rs-2272009/v1), 2022-11-30
Supplement: Supplementary file 2 [file 50047693f94ce2152646713a.xlsx]

## Sheet: Sheet1
List of Antibody
Specificity	Fluorochrome	Clone	Catalog #	Vendor
CD3	Alexa Fluor 488	OKT3	317310	Biolegend
CD3	PerCP-Cy5.5	SK7	344808	Biolegend
CD3	Biotin- PE-Cy7	SK7	344820	Biolegend
CD16	Alexa Fluor 700	3G8	302026	Biolegend
CD14	APC-Fire 750	63D3	367120	Biolegend
CD8	APC-Fire 750	SK1	344746	Biolegend
CD57	APC	HNK-1	359610*	Biolegend
CD19	Biotin- PE-Cy7	HIB19	302204	Biolegend
CD19	BV421	HIB19	302234	Biolegend
CD20	Biotin- PE-Cy7/BV605	2H7	302350	Biolegend
CD20	BV510	2H7	302340	Biolegend
CD56	Biotin- PE-Cy7	HCD56	318320	Biolegend
CD56	BV510	HCD56	318340	Biolegend
CD158e1	BV421	DX9	312714	Biolegend
HLA-DR	BV650	L243	307650	Biolegend
CD314	BV650	1D11	563408	BD
CD94	FITC	DX22	305504	Biolegend
CD4	FITC	SK3	344604	Biolegend
CD336	PE	P44-8	325108	Biolegend
CD337	PE-Cy7	AF29-4D12	25-3379-42	Thermo Fisher
CD244	PE-Dazzle 594	C1.7	329522	Biolegend
Streptavidin	PE-Cy7 Streptavidin		405206	Biolegend
Streptavidin	BV605 Streptavidin		405229	Biolegend
*359610 is catalog# replacing 322314, used in this study
