# Supplementary material for: Single-cell profiling identifies a CD8bright CD244bright Natural Killer cell subset that reflects disease activity in HLA-A29-positive birdshot chorioretinopathy.
Source: Research Square preprint supplement (doi:10.21203/rs.3.rs-2272009/v1), 2022-11-30
Supplement: Supplementary file 3 [file 7aa6fee74cec05484b0fa724.xlsx]

## Sheet: Sheet1
Sample_ID	ShortNameType	submitted_name	experiment_type	SampleType	SampleDescription	Age	Sex	Race	SampleBatch	Sample prepared	DateReceived
#189	3R189_HC	NS3R189BTS	SCRNA-Seq	HC	Healthy Control	37	F	C	1	2020-12-02	2021-01-04
#24	13R24_BCR-UV	NS13R24BTS	SCRNA-Seq	BCR-UV	Birdshot Uveitis	40	F	C	1	2020-12-02	2021-01-04
#29	6R29_BCR-UV	NS6R29BTS	SCRNA-Seq	BCR-UV	Birdshot Uveitis	58	M	C	3	2021-01-27	2021-08-23
#231	2R231_HC	NS2R231BTS	SCRNA-Seq	HC	Healthy Control	35	F	C	3	2021-01-27	2021-08-23
#242	13R242_HC	NS13R242BTS	SCRNA-Seq	HC	Healthy Control	21	F	B	4	2021-02-03	2021-03-09
#65	7R65B_BCR-UV	NS7R65BBTS	SCRNA-Seq	BCR-UV	Birdshot Uveitis	56	F	C	4	2021-02-03	2021-03-09
#170	2R170_HC	NS2R170BTS	SCRNA-Seq	HC	Healthy Control	49	M	B	5	2021-02-10	2021-03-09
#69	5R69_BCR-UV	NS5R69BTS	SCRNA-Seq	BCR-UV	Birdshot Uveitis	81	F	C	5	2021-02-10	2021-03-09
#191	7R191_HC	NS7R191BTS	SCRNA-Seq	HC	Healthy Control	54	M	C	6	2021-03-03	2021-04-09
#45	14R45_BCR-UV	NS14R45BTS	SCRNA-Seq	BCR-UV	Birdshot Uveitis	79	M	C	6	2021-03-03	2021-04-09
#119	8R119_BCR-UV	NS8R119BTS	SCRNA-Seq	BCR-UV	Birdshot Uveitis	74	F	C	7	2021-03-17	2021-04-13
#230	6R230_HC	NS6R230BTS	SCRNA-Seq	HC	Healthy Control	76	M	C	7	2021-03-17	2021-04-13
#31	4R31_BCR_UV	NS4R31BTS	SCRNA-Seq	BCR-UV	Birdshot Uveitis	57	F	C	8	2021-03-24	2021-04-13
#204	6R204_HC	NS6R204BTS	SCRNA-Seq	HC	Healthy Control	54	F	C	8	2021-03-24	2021-04-13
#33	13R33_BCR-UV	NS13R33BTS	SCRNA-Seq	BCR-UV	Birdshot Uveitis	57	M	C	9	2021-04-07	2021-04-30
#221	9R221_HC	NS9R221BTS	SCRNA-Seq	HC	Healthy Control	61	F	C	9	2021-04-07	2021-11-23
#227	11R227_HC	NS11R227BTS	SCRNA-Seq	HC	Healthy Control	66	M	C	10	2021-04-14	2021-04-30
#226	6R226_BCR-UV	NS6R226BTS	SCRNA-Seq	BCR-UV	Birdshot Uveitis	65	M	U	11	2021-04-14	2021-05-18
#234	8R234_HC	NS8R234BTS	SCRNA-Seq	HC	Healthy Control	23	F	C	11	2021-04-21	2021-05-18
#32	2R32_BCR-UV	NS2R32BTS	SCRNA-Seq	BCR-UV	Birdshot Uveitis	67	F	C	11	2021-04-21	2021-06-02
#205	4R205_HC	NS4R205BTS	SCRNA-Seq	HC	Healthy Control	34	F	S	12	2021-04-28	2021-06-02
#51	13R51_BCR-UV	NS13R51BTS	SCRNA-Seq	BCR-UV	Birdshot Uveitis	67	F	C	12	2021-04-28	2021-06-02
#207	1R207_HC	NS1R207BTS	SCRNA-Seq	HC	Healthy Control	18	F	B	13	2021-05-12	2021-06-09
#63	4R63_BCR-UV	NS4R63BTS	SCRNA-Seq	BCR-UV	Birdshot Uveitis	65	F	C	13	2021-05-12	2021-06-16
