# Supplementary material for: Single-cell profiling identifies a CD8bright CD244bright Natural Killer cell subset that reflects disease activity in HLA-A29-positive birdshot chorioretinopathy.
Source: Research Square preprint supplement (doi:10.21203/rs.3.rs-2272009/v1), 2022-11-30
Supplement: Supplementary file 4 [file d7e80d8e29755887606b3231.xlsx]

## Sheet: Sheet1
Healthy Controls
iBank ID #	Age	Gender	Race
iBank-064-Baseline-Healthy	26	Male	Asian
iBank-133-Baseline-Healthy	41	Male	Hispanic
iBank-140-Baseline-Healthy	45	Male	Caucasian
iBank-142-Baseline-Healthy	31	Female	Caucasian
iBank-143-Baseline-Healthy	32	Male	Caucasian
iBank-150-Baseline-Healthy	63	Female	Caucasian
iBank-167-Baseline-Healthy	33	Male	Declined
iBank-170-Baseline-Healthy	49	Male	Black
iBank-175-Baseline-Healthy	29	Female	Black
iBank-177-Baseline-Healthy	51	Female	Asian
iBank-178-Baseline-Healthy	60	Female	Caucasian
iBank-183-Baseline-Healthy	35	Male	Caucasian
iBank-189-Baseline-Healthy	37	Female	Caucasian
iBank-190-Baseline-Healthy	32	Female	Black
iBank-191-Baseline-Healthy	54	Male	Caucasian
iBank-192-Baseline-Healthy	32	Male	Caucasian
iBank-194-Baseline-Healthy	31	Female	Caucasian
iBank-197-Baseline-Healthy	24	Male	Black
iBank-204-Baseline-Healthy	54	Female	Caucasian
iBank-205-Baseline-Healthy	34	Female	Asian
iBank-208-Baseline-Healthy	27	Male	Asian
iBank-209-Baseline-Healthy	41	Female	Caucasian
iBank-210-Baseline-Healthy	32	Female	Asian
iBank-211-Baseline-Healthy	35	Male	Caucasian
iBank-212-Baseline-Healthy	33	Male	Caucasian
iBank-213-Baseline-Healthy	34	Female	Hispanic
iBank-221-Baseline-Healthy	61	Female	Caucasian
iBank-222-Baseline-Healthy	27	Female	Caucasian
iBank-230-Baseline-Healthy	75	Male	Caucasian
iBank-231-Baseline-Healthy	35	Female	Caucasian
iBank-233-Baseline-Healthy	39	Female	Caucasian
iBank-234-Baseline-Healthy	23	Female	Caucasian
iBank-236-Baseline-Healthy	42	Female	Caucasian
iBank-242-Baseline-Healthy	21	Female	Black
iBank-244-Baseline-Healthy	30	Female	Declined
iBank-245-Baseline-Healthy	46	Female	Black
iBank-248-Baseline-Healthy	19	Male	Asian
iBank-251-Baseline-Healthy	42	Male	Caucasian
iBank-254-Baseline-Healthy	27	Male	Caucasian
iBank-256-Baseline-Healthy	33	Female	Caucasian
iBank-258-Baseline-Healthy	67	Female	Caucasian
iBank-264-Baseline-Healthy	33	Female	Asian
iBank-265-Baseline-Healthy	22	Female	Caucasian
iBank-266-Baseline-Healthy	23	Female	Black
iBank-268-Baseline-Healthy	35	Male	Black
iBank-270-Baseline-Healthy	57	Female	Asian
iBank-272-Baseline-Healthy	30	Female	Caucasian
iBank-274-Baseline-Healthy	28	Male	Black
iBank-275-Baseline-Healthy	38	Male	Black
iBank-279-Baseline-Healthy	55	Male	Caucasian
iBank-4818-Baseline-Healthy	36	Male	Caucasian
iBank-4820-Baseline-Healthy	49	Male	Declined
iBank-4824-Baseline-Healthy	48	Male	Caucasian
iBank-4829-Baseline-Healthy	48	Male	Caucasian
iBank-4831-Baseline-Healthy	50	Male	Black
iBank-4833-Baseline-Healthy	50	Female	Caucasian
iBank-4838-Baseline-Healthy	41	Male	Caucasian
iBank-4840-Baseline-Healthy	53	Female	Asian
iBank-4842-Baseline-Healthy	48	Male	Declined
iBank-4849-Baseline-Healthy	56	Male	Hispanic
iBank-4851-Baseline-Healthy	48	Male	Caucasian
iBank-4852-Baseline-Healthy	37	Male	Native American
iBank-4857-Baseline-Healthy	51	Male	Caucasian
iBank-4858-Baseline-Healthy	57	Male	Caucasian
iBank-4860-Baseline-Healthy	60	Female	Black
iBank-4861-Baseline-Healthy	57	Female	Caucasian
iBank-4862-Baseline-Healthy	46	Female	Black
iBank-4863-Baseline-Healthy	50	Male	Black
iBank-4866-Baseline-Healthy	41	Female	Caucasian
iBank-4868-Baseline-Healthy	29	Female	Caucasian
iBank-4869-Baseline-Healthy	39	Female	Caucasian
iBank-4874-Baseline-Healthy	45	Female	Caucasian
iBank-4876-Baseline-Healthy	45	Female	Caucasian
iBank-4891-Baseline-Healthy	61	Male	Caucasian
iBank-4898-Baseline-Healthy	56	Male	Caucasian
iBank-4904-Baseline-Healthy	34	Female	Caucasian
iBank-4905-Baseline-Healthy	57	Female	Caucasian
iBank-4906-Baseline-Healthy	59	Female	Asian
iBank-4914-Baseline-Healthy	40	Female	Declined
iBank-4959-Baseline-Healthy	61	Male	Caucasian
Uveitis Patients
iBank ID #	Age	Gender	Race
iBank-013-Baseline-Patient	29	Female	Caucasian
iBank-024-Baseline-Patient	29	Female	Caucasian
iBank-029-Baseline-Patient	58	Male	Caucasian
iBank-030-Baseline-Patient	23	Male	Caucasian
iBank-031-Baseline-Patient	57	Female	Caucasian
iBank-032-Baseline-Patient	67	Female	Caucasian
iBank-033-Baseline-Patient	57	Male	Caucasian
iBank-034-Baseline-Patient	29	Female	Black
iBank-036-Baseline-Patient	29	Female	Caucasian
iBank-037-Baseline-Patient	69	Male	Caucasian
iBank-039-Baseline-Patient	52	Male	Caucasian
iBank-040-Baseline-Patient	41	Male	Mixed
iBank-041-Baseline-Patient	59	Female	Black
iBank-042-Baseline-Patient	63	Male	Caucasian
iBank-043-Baseline-Patient	41	Female	Caucasian
iBank-044-Baseline-Patient	33	Female	Caucasian
iBank-045-Baseline-Patient	79	Male	Caucasian
iBank-047-Baseline-Patient	41	Male	Hispanic
iBank-048-Baseline-Patient	67	Male	Caucasian
iBank-050-Baseline-Patient	41	Female	Caucasian
iBank-051-Baseline-Patient	67	Female	Caucasian
iBank-052-Baseline-Patient	69	Male	Caucasian
iBank-056-Baseline-Patient	63	Female	Black
iBank-057-Baseline-Patient	73	Female	Caucasian
iBank-058-Baseline-Patient	38	Female	Caucasian
iBank-059-Baseline-Patient	59	Female	Black
iBank-060-Baseline-Patient	52	Male	Black
iBank-061-Baseline-Patient	50	Female	Caucasian
iBank-062-Baseline-Patient	73	Female	Caucasian
iBank-063-Baseline-Patient	65	Female	Caucasian
iBank-065-Baseline-Patient	56	Female	Caucasian
iBank-066-Baseline-Patient	25	Female	Black
iBank-069-Baseline-Patient	81	Female	Caucasian
iBank-070-Baseline-Patient	38	Female	Hispanic
iBank-071-Baseline-Patient	39	Female	Black
iBank-072-Baseline-Patient	17	Female	Caucasian
iBank-073-Baseline-Patient	34	Male	Hispanic
iBank-074-Baseline-Patient	57	Female	Caucasian
iBank-075-Baseline-Patient	68	Female	Caucasian
iBank-078-Baseline-Patient	18	Female	Caucasian
iBank-080-Baseline-Patient	63	Male	Black
iBank-081-Baseline-Patient	9	Male	Black
iBank-083-Baseline-Patient	36	Male	Asian
iBank-086-Baseline-Patient	50	Female	Black
iBank-087-Baseline-Patient	15	Female	Caucasian
iBank-088-Baseline-Patient	28	Female	Black
iBank-090-Baseline-Patient	13	Male	Mixed
iBank-092-Baseline-Patient	41	Female	Caucasian
iBank-094-Baseline-Patient	70	Female	Black
iBank-095-Baseline-Patient	74	Male	Black
iBank-096-Baseline-Patient	46	Female	Hispanic
iBank-097-Baseline-Patient	20	Female	Asian
iBank-098-Baseline-Patient	19	Female	Hispanic
iBank-099-Baseline-Patient	20	Male	Caucasian
iBank-100-Baseline-Patient	46	Female	Black
iBank-101-Baseline-Patient	48	Male	Hispanic
iBank-102-Baseline-Patient	60	Male	Hispanic
iBank-103-Baseline-Patient	67	Female	Black
iBank-105-Baseline-Patient	65	Female	Caucasian
iBank-106-Baseline-Patient	38	Male	Caucasian
iBank-107-Baseline-Patient	23	Male	Caucasian
iBank-112-Baseline-Patient	33	Female	Hispanic
iBank-113-Baseline-Patient	62	Female	Black
iBank-114-Baseline-Patient	17	Male	Caucasian
iBank-115-Baseline-Patient	72	Female	Caucasian
iBank-116-Baseline-Patient	42	Male	Caucasian
iBank-117-Baseline-Patient	44	Female	Asian
iBank-118-Baseline-Patient	68	Female	Caucasian
iBank-119-Baseline-Patient	38	Female	Black
iBank-120-Baseline-Patient	52	Male	Hispanic
iBank-121-Baseline-Patient	55	Female	Black
iBank-122-Baseline-Patient	51	Female	Caucasian
iBank-123-Baseline-Patient	8	Female	Black
iBank-124-Baseline-Patient	70	Male	Caucasian
iBank-125-Baseline-Patient	44	Female	Black
iBank-126-Baseline-Patient	19	Female	Black
iBank-127-Baseline-Patient	21	Male	Black
iBank-128-Baseline-Patient	60	Male	Black
iBank-130-Baseline-Patient	12	Female	Black
iBank-131-Baseline-Patient	50	Male	Black
iBank-132-Baseline-Patient	14	Female	Hispanic
iBank-134-Baseline-Patient	37	Male	Hispanic
iBank-135-Baseline-Patient	53	Female	Black
iBank-136-Baseline-Patient	81	Female	Caucasian
iBank-137-Baseline-Patient	43	Female	Mixed
iBank-138-Baseline-Patient	56	Female	Black
iBank-139-Baseline-Patient	42	Male	Caucasian
iBank-145-Baseline-Patient	54	Male	Mixed
iBank-147-Baseline-Patient	61	Female	Black
iBank-148-Baseline-Patient	13	Female	Hispanic
iBank-149-Baseline-Patient	35	Female	Caucasian
iBank-151-Baseline-Patient	44	Female	Asian
iBank-153-Baseline-Patient	15	Female	Black
iBank-154-Baseline-Patient	53	Female	Caucasian
iBank-155-Baseline-Patient	41	Female	Asian
iBank-156-Baseline-Patient	24	Female	Caucasian
iBank-160-Baseline-Patient	62	Female	Caucasian
iBank-161-Baseline-Patient	48	Female	Black
iBank-162-Baseline-Patient	54	Female	Black
iBank-165-Baseline-Patient	53	Male	Mixed
iBank-172-Baseline-Patient	33	Female	Black
iBank-173-Baseline-Patient	30	Female	Black
iBank-174-Baseline-Patient	32	Male	Black
iBank-180-Baseline-Patient	61	Female	Caucasian
iBank-181-Baseline-Patient	54	Male	Black
iBank-182-Baseline-Patient	66	Female	Caucasian
iBank-184-Baseline-Patient	58	Male	Asian
iBank-186-Baseline-Patient	14	Female	Black
iBank-193-Baseline-Patient	57	Male	Mixed
iBank-198-Baseline-Patient	63	Male	Black
iBank-199-Baseline-Patient	26	Male	Caucasian
iBank-225-Baseline-Patient	60	Male	Declined
iBank-226-Baseline-Patient	65	Male	Declined
iBank-229-Baseline-Patient	28	Female	Asian
iBank-235-Baseline-Patient	20	Male	Caucasian
iBank-237-Baseline-Patient	23	Female	Black
iBank-238-Baseline-Patient	34	Female	Black
iBank-246-Baseline-Patient	40	Male	Black
iBank-247-Baseline-Patient	43	Male	Caucasian
iBank-249-Baseline-Patient	42	Female	Black
iBank-252-Baseline-Patient	69	Female	Caucasian
iBank-253-Baseline-Patient	32	Female	Caucasian
iBank-255-Baseline-Patient	27	Male	Black
iBank-257-Baseline-Patient	67	Female	Caucasian
iBank-259-Baseline-Patient	41	Female	Caucasian
iBank-260-Baseline-Patient	44	Female	Caucasian
iBank-261-Baseline-Patient	41	Female	Declined
iBank-262-Baseline-Patient	58	Female	Caucasian
iBank-271-Baseline-Patient	16	Male	Asian
iBank-277-Baseline-Patient	47	Male	Caucasian
iBank-278-Baseline-Patient	34	Female	Caucasian
iBank-280-Baseline-Patient	41	Male	Caucasian
iBank-283-Baseline-Patient	30	Female	Caucasian
iBank-287-Baseline-Patient	40	Female	Black
iBank-288-Baseline-Patient	40	Female	Caucasian
iBank-293-Baseline-Patient	15	Female	Asian
iBank-294-Baseline-Patient	26	Female	Hispanic
iBank-295-Baseline-Patient	49	Female	Asian
iBank-296-Baseline-Patient	51	Male	Asian
