# Supplementary material for: Single-cell profiling identifies a CD8bright CD244bright Natural Killer cell subset that reflects disease activity in HLA-A29-positive birdshot chorioretinopathy.
Source: Research Square preprint supplement (doi:10.21203/rs.3.rs-2272009/v1), 2022-11-30
Supplement: Supplementary file 5 [file eadb1bace1bf5d5761575187.xlsx]

## Sheet: Sheet1
	SampleID	Age	Race	Estimated Number of Cells	Mean Reads per Cell	Median Genes per Cell	Number of Reads	Valid Barcodes	Sequencing Saturation	Q30 Bases in Barcode	Q30 Bases in RNA Read	Q30 Bases in UMI	Reads Mapped to Genome	Reads Mapped Confidently to Genome	Reads Mapped Confidently to Intergenic Regions	Reads Mapped Confidently to Intronic Regions	Reads Mapped Confidently to Exonic Regions	Reads Mapped Confidently to Transcriptome	Reads Mapped Antisense to Gene	Fraction Reads in Cells	Total Genes Detected	Median UMI Counts per Cell
Healthy control
1	#189	37	Caucasian	26068	16468	728	429295226	0.984	0.707	0.963	0.934	0.963	0.968	0.943	0.036	0.294	0.614	0.588	0.014	0.806	23269	1749
2	#191	54	Caucasian	17162	12944	715	222148991	0.956	0.472	0.881	0.875	0.884	0.919	0.88	0.046	0.344	0.49	0.459	0.018	0.856	24357	1796
3	#231	35	Caucasian	11818	26991	1283	318981381	0.975	0.676	0.922	0.897	0.921	0.952	0.928	0.033	0.303	0.591	0.557	0.02	0.903	24028	3938
4	#242	21	Black	19015	19472	1069	370266124	0.985	0.683	0.94	0.914	0.94	0.966	0.944	0.027	0.192	0.725	0.696	0.007	0.949	23683	3369
5	#170	49	Black	11400	21531	827	245447907	0.967	0.748	0.892	0.874	0.891	0.93	0.888	0.046	0.225	0.617	0.582	0.018	0.907	23175	2043
6	#230	76	Caucasian	3724	81800	1296	304622793	0.977	0.83	0.913	0.895	0.914	0.944	0.912	0.043	0.308	0.561	0.534	0.015	0.702	21909	3466
7	#204	54	Caucasian	13504	18280	1153	246856921	0.963	0.535	0.897	0.883	0.9	0.941	0.901	0.05	0.304	0.546	0.516	0.017	0.91	24248	3580
8	#221	61	Caucasian	9952	15833	663	157570977	0.918	0.508	0.973	0.908	0.978	0.882	0.813	0.052	0.311	0.451	0.414	0.025	0.736	22070	1561
9	#227	66	Declined	5330	61995	748	330434137	0.892	0.879	0.93	0.9	0.93	0.753	0.699	0.049	0.276	0.374	0.345	0.018	0.785	21326	1347
10	#234	23	Caucasian	15357	13376	840	205419946	0.953	0.468	0.887	0.852	0.886	0.914	0.874	0.044	0.303	0.526	0.494	0.02	0.897	24039	1870
11	#205	34	Asian	7234	27466	615	198685549	0.932	0.598	0.873	0.8	0.875	0.59	0.531	0.042	0.191	0.298	0.275	0.015	0.684	21940	1493
12	#207	18	Black	12676	17104	794	216815362	0.938	0.483	0.876	0.845	0.876	0.742	0.69	0.041	0.212	0.437	0.41	0.014	0.907	23394	2494
Birdshot uveitis
1	#24	40	Caucasian	44461	10206	496	453749983	0.978	0.714	0.956	0.937	0.956	0.968	0.936	0.037	0.265	0.635	0.593	0.027	0.711	24101	997
2	#45	79	Caucasian	17828	11481	577	204674796	0.949	0.521	0.884	0.862	0.885	0.876	0.839	0.043	0.291	0.505	0.465	0.021	0.807	23875	1301
3	#29	58	Caucasian	13141	18417	1157	242012180	0.971	0.613	0.881	0.868	0.88	0.923	0.901	0.031	0.278	0.592	0.561	0.016	0.942	23898	3003
4	#65	56	Caucasian	13964	23057	1201	321967184	0.986	0.699	0.939	0.904	0.938	0.966	0.944	0.035	0.189	0.72	0.696	0.008	0.92	23519	3758
5	#69	81	Caucasian	9503	27382	1151	260211276	0.97	0.579	0.897	0.882	0.897	0.949	0.916	0.042	0.28	0.593	0.563	0.016	0.726	23840	3229
6	#119	74	Caucasian	3691	59339	910	219021864	0.962	0.822	0.876	0.857	0.876	0.907	0.856	0.052	0.339	0.464	0.432	0.019	0.686	21822	1953
7	#31	57	Caucasian	13405	15147	864	203048042	0.947	0.393	0.878	0.848	0.879	0.828	0.765	0.057	0.306	0.402	0.371	0.019	0.863	24571	2121
8	#33	57	Caucasian	10257	33439	754	342986407	0.899	0.727	0.94	0.911	0.94	0.925	0.813	0.059	0.272	0.482	0.437	0.031	0.593	22720	1667
9	#226	65	Declined	7486	31447	1050	235413721	0.924	0.594	0.899	0.859	0.897	0.752	0.677	0.052	0.26	0.365	0.344	0.011	0.912	23082	2938
10	#32	67	Caucasian	6882	33656	1135	231619286	0.954	0.593	0.862	0.851	0.866	0.92	0.884	0.045	0.283	0.555	0.524	0.018	0.758	23720	3466
11	#51	67	Caucasian	9394	30747	820	288836332	0.951	0.668	0.907	0.87	0.907	0.769	0.717	0.048	0.275	0.394	0.364	0.02	0.834	23622	2109
12	#63	65	Caucasian	10029	19928	293	199853345	0.863	0.238	0.855	0.768	0.858	0.264	0.195	0.042	0.081	0.072	0.065	0.005	0.661	19740	498
